# Supplementary material for: Detailed kinetic model for combustion of NH 3 /H 2 blends
Source: Royal Society of Chemistry journal article supplement (doi:10.1039/d5cp04149j), 2026-01-01
Supplement: d5cp04149j2.zip [file H_H2NO_CBS_extrapolation.xlsx]

## Sheet: Sheet2
	TZ	QZ	tot tz	tot qz	rel TZ	rel QZ	CBS	CBS kj/mol	ZPE	cbs + zpe	rel E0	ATcT
NH2OH	-131.553	-131.587	-131.553	-131.587	0	0	0	0	105.72	105.72	0	-33.06	0
NH3O	-131.513	-131.548	-131.513	-131.548	0.0394938	0.0392795	0.0391308	102.736	108.04	210.776	105.056	72.2	105.26
H2	-1.17264	-1.17387
HNO	-130.31	-130.343	-131.482	-131.516	0.0702147	0.0707982	0.071203	186.941	62.62	249.561	143.841	109.94	143
H	-0.499821	-0.499948
H2NO	-130.918	-130.952	-131.418	-131.452	0.134607	0.135567	0.136232	357.672	70.07	427.742	322.022	286.684	319.744
TS	-131.423	-131.457	-131.423	-131.457	0.129536	0.129975	0.130279	342.043	73.93	415.973	310.253
