# Supplementary figures and images for: Detailed kinetic model for combustion of NH 3 /H 2 blends
Source: Royal Society of Chemistry journal article supplement (doi:10.1039/d5cp04149j), 2026-01-01

NH3O <=> NH2OH

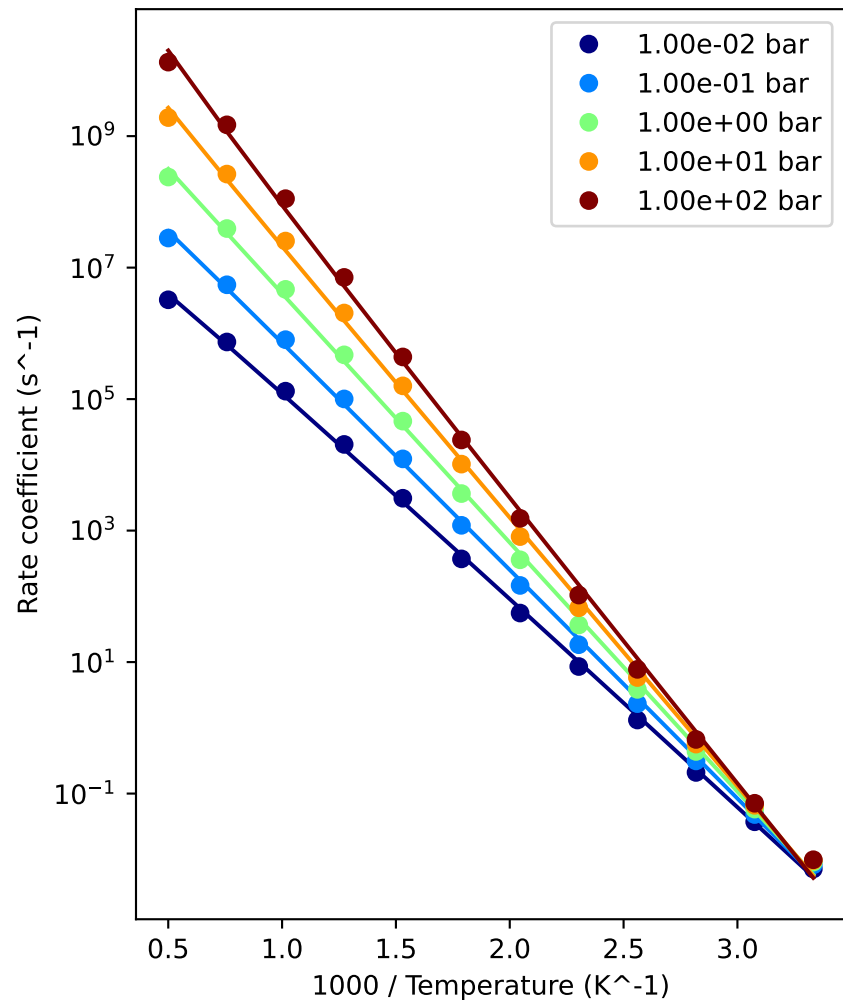

NH3O <=> NH2OH

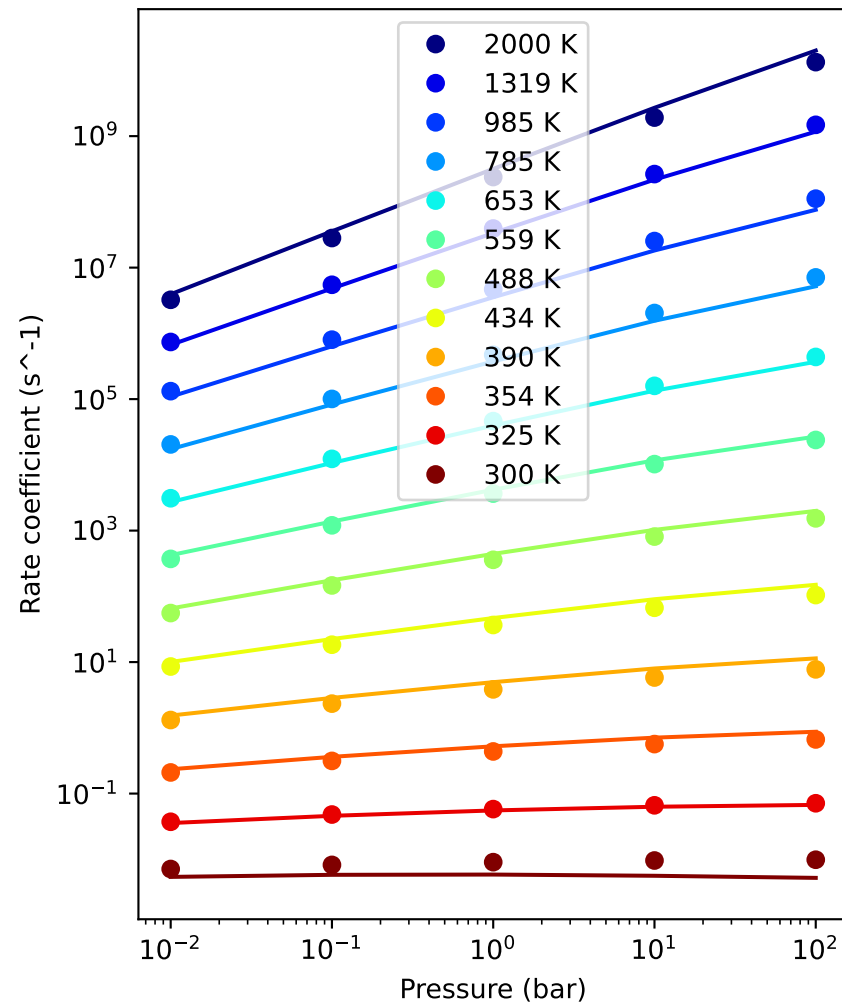

Supplement: d5cp04149j2.zip [file kinetics_1.pdf › NH3_PCCP_SI_revision_Feb11/figures/kinetics_1.pdf]

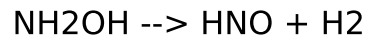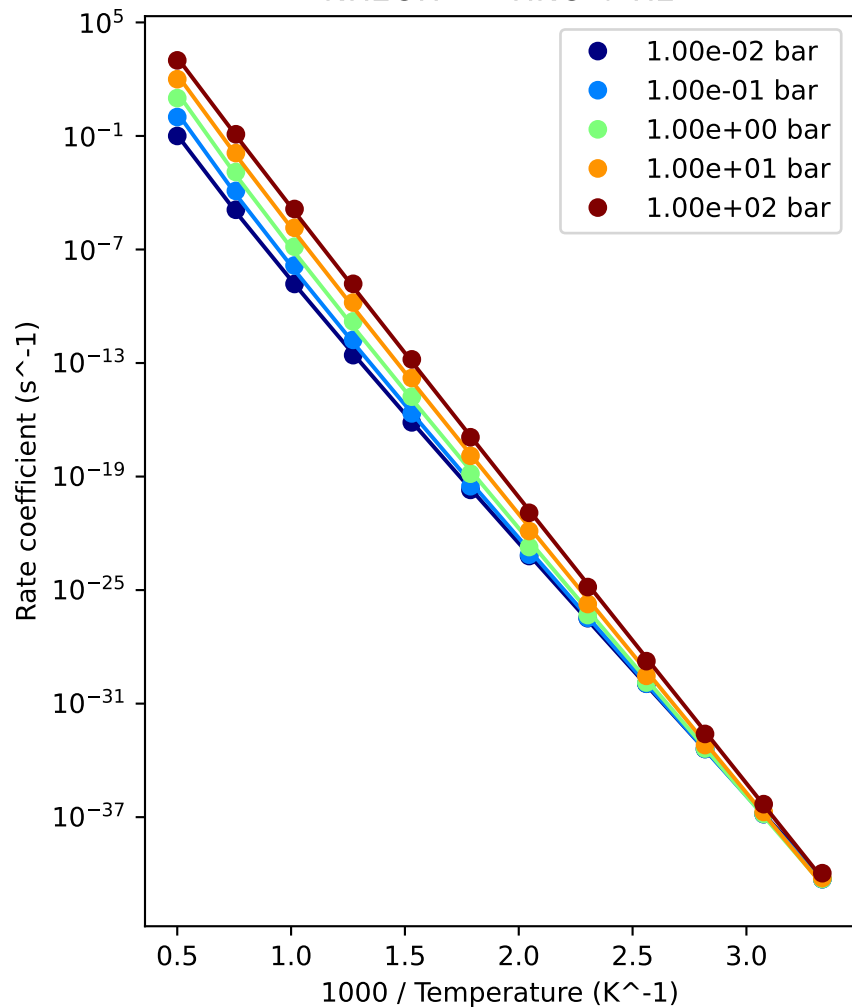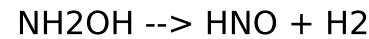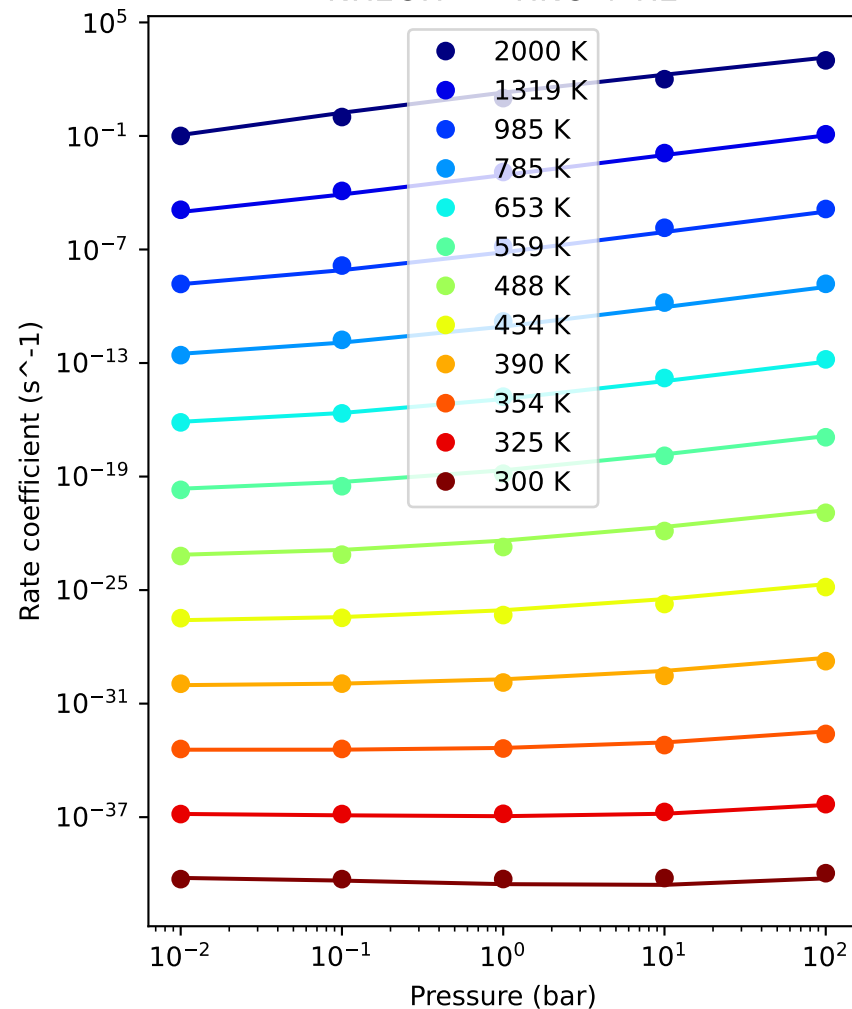

Supplement: d5cp04149j2.zip [file kinetics_10.pdf › NH3_PCCP_SI_revision_Feb11/figures/kinetics_10.pdf]

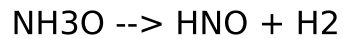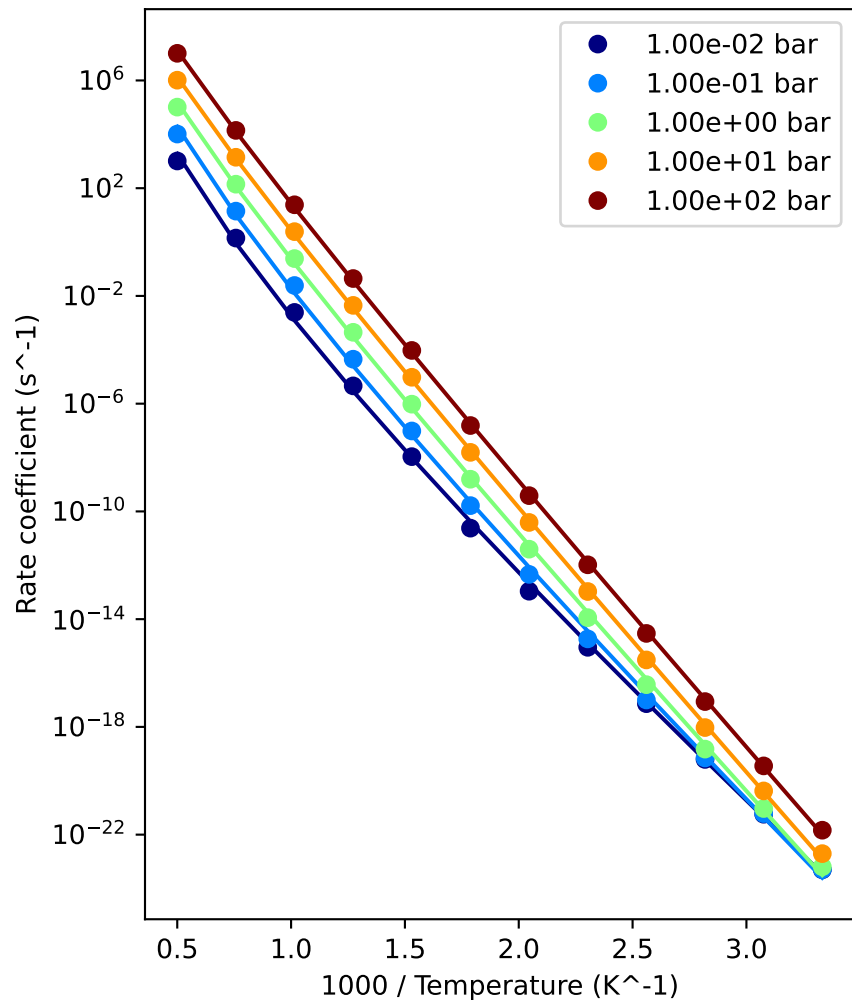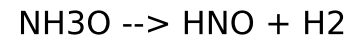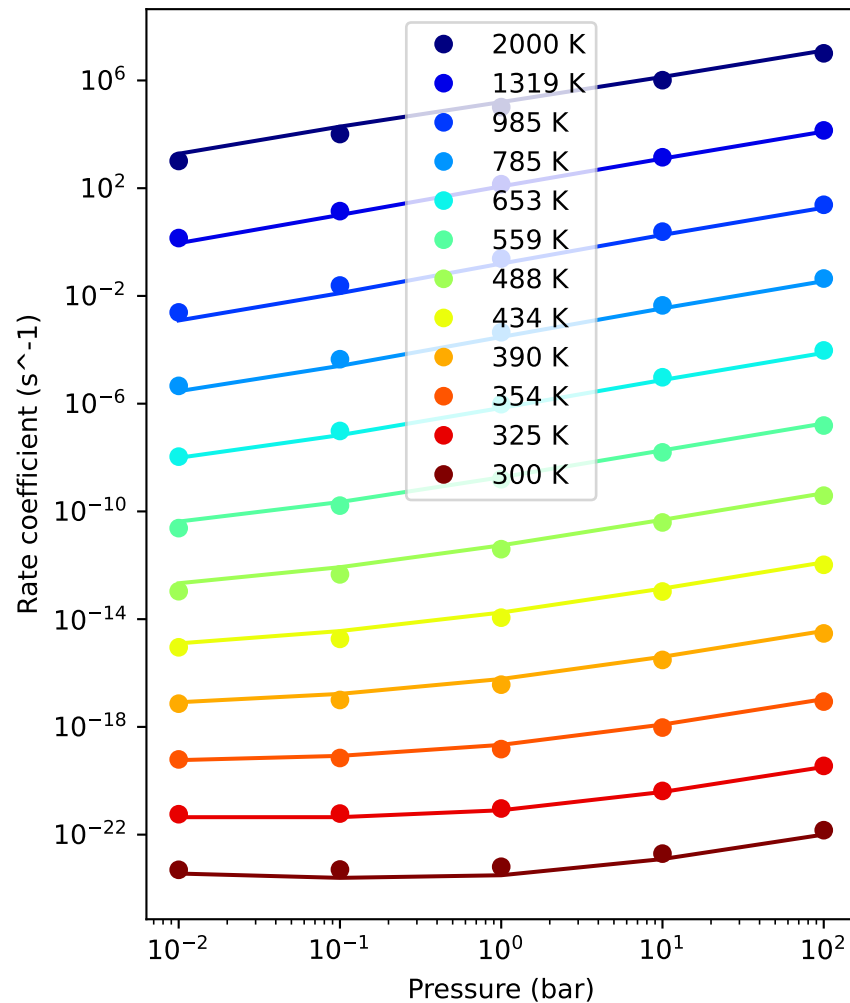

Supplement: d5cp04149j2.zip [file kinetics_11.pdf › NH3_PCCP_SI_revision_Feb11/figures/kinetics_11.pdf]

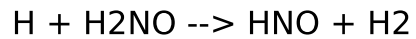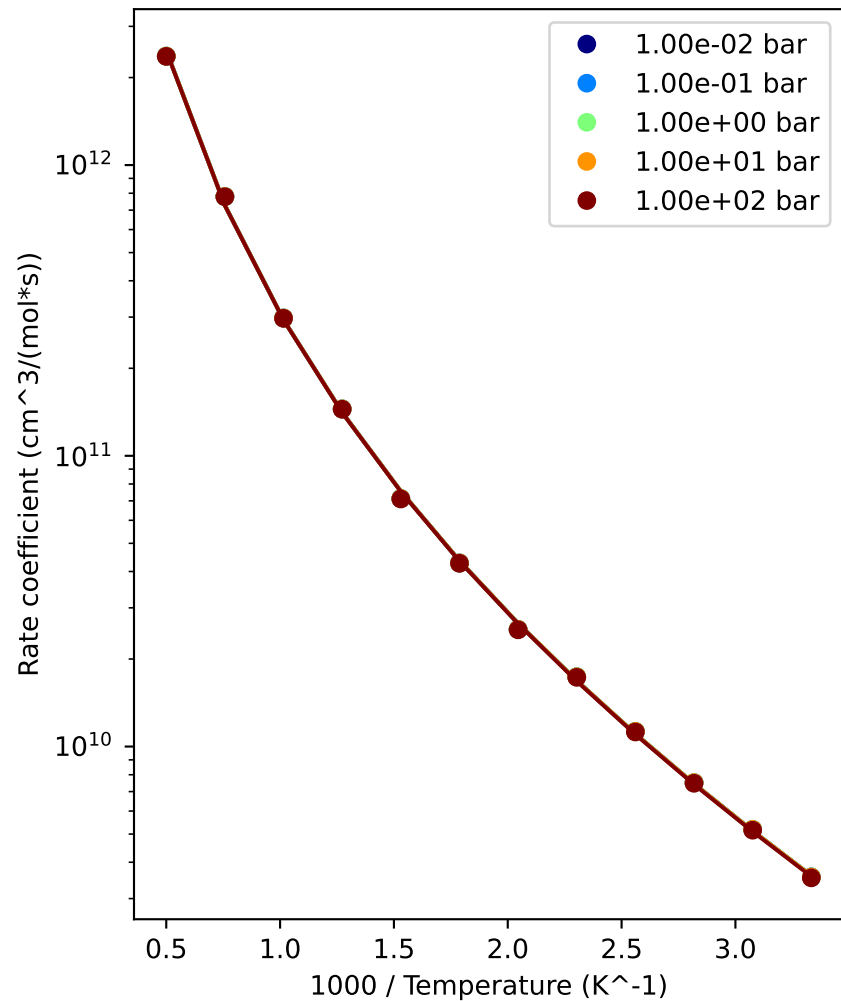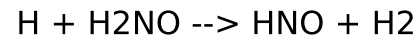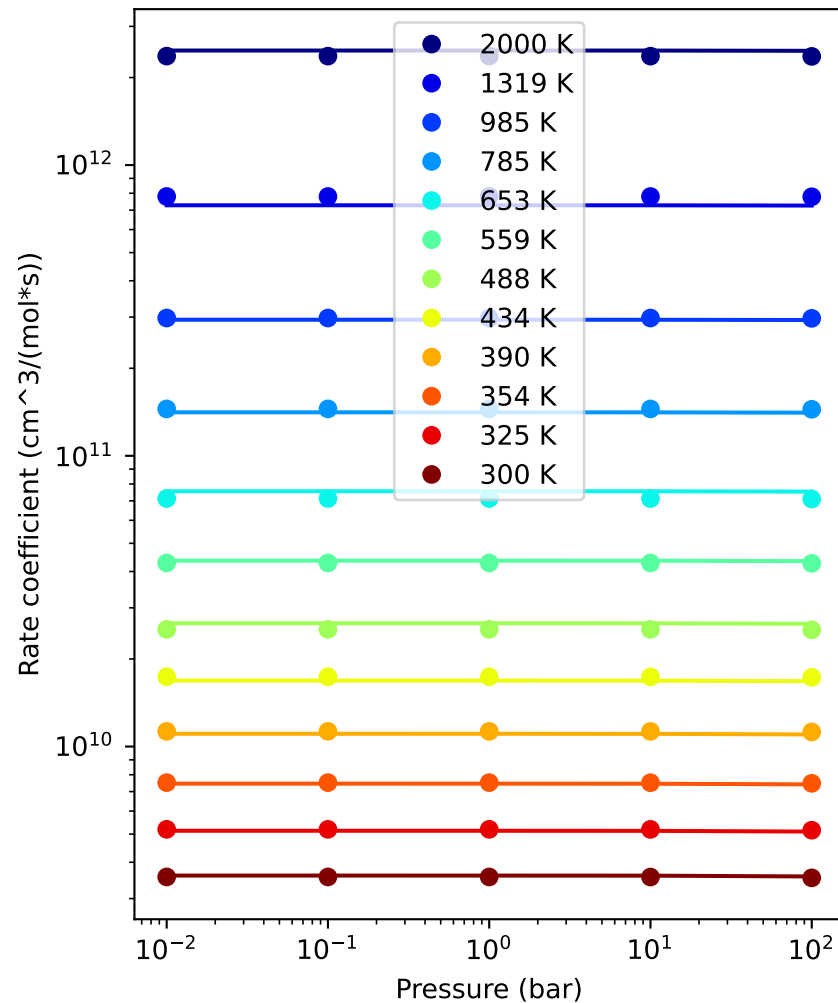

Supplement: d5cp04149j2.zip [file kinetics_12.pdf › NH3_PCCP_SI_revision_Feb11/figures/kinetics_12.pdf]

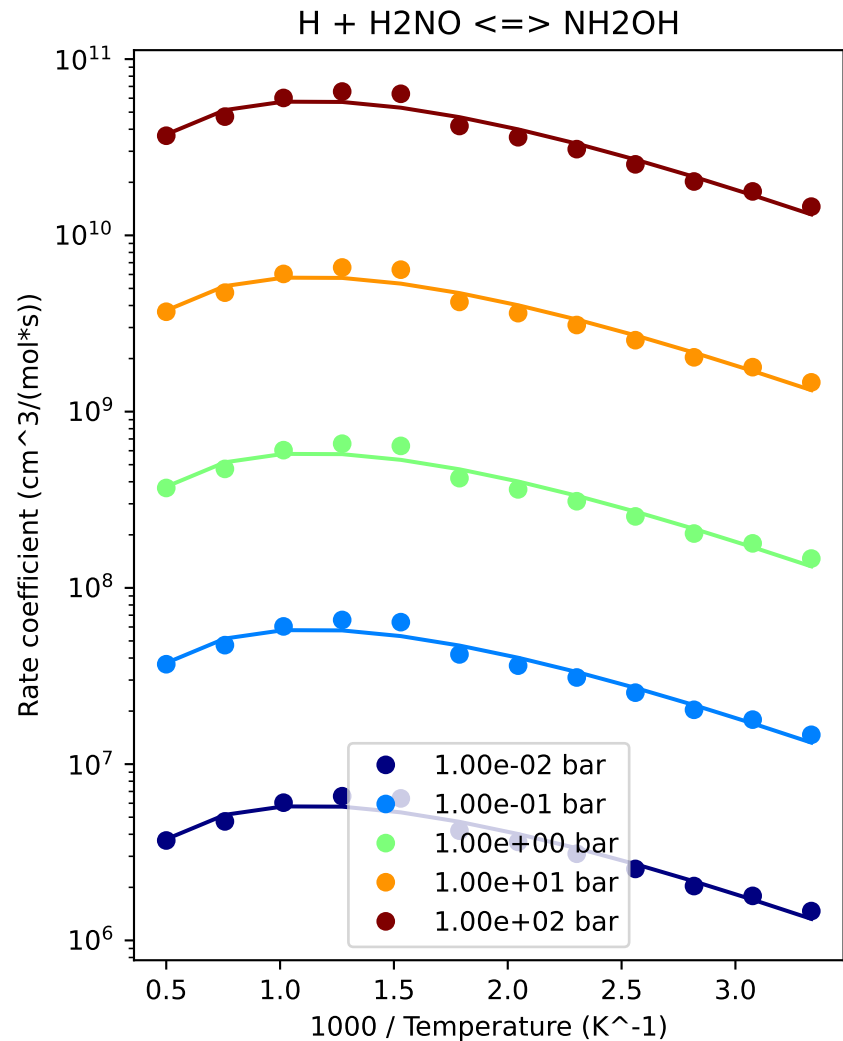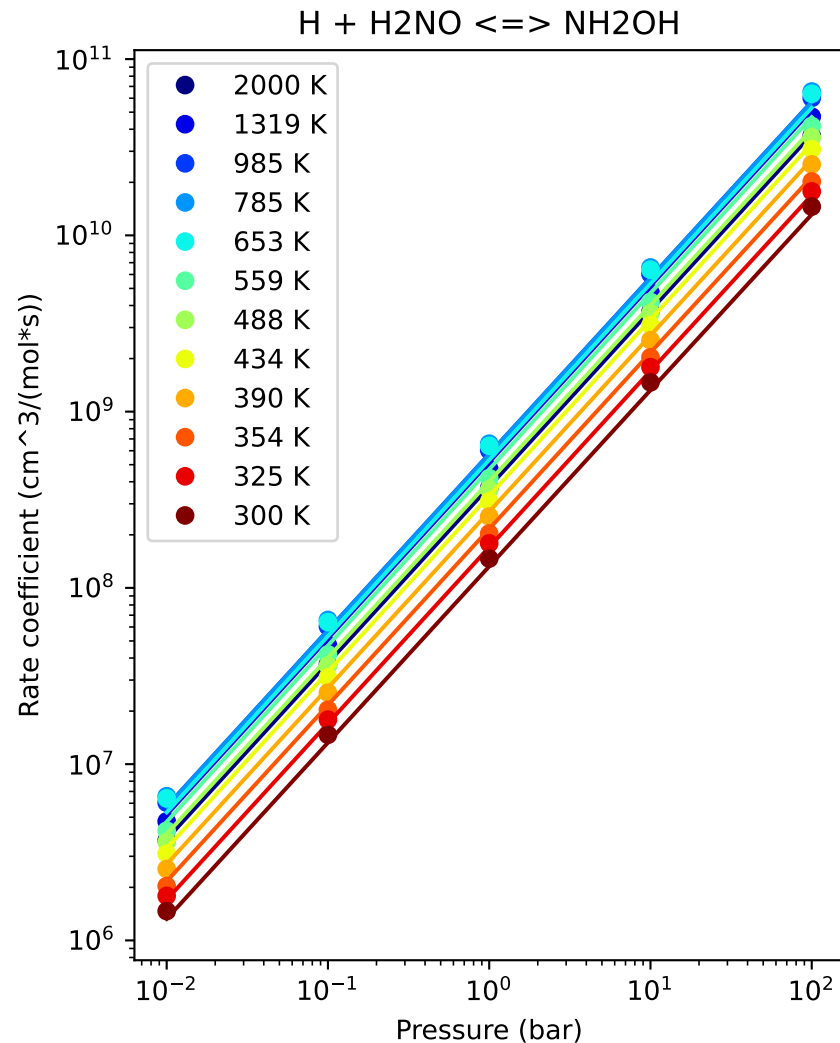

Supplement: d5cp04149j2.zip [file kinetics_2.pdf › NH3_PCCP_SI_revision_Feb11/figures/kinetics_2.pdf]

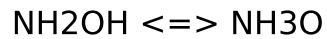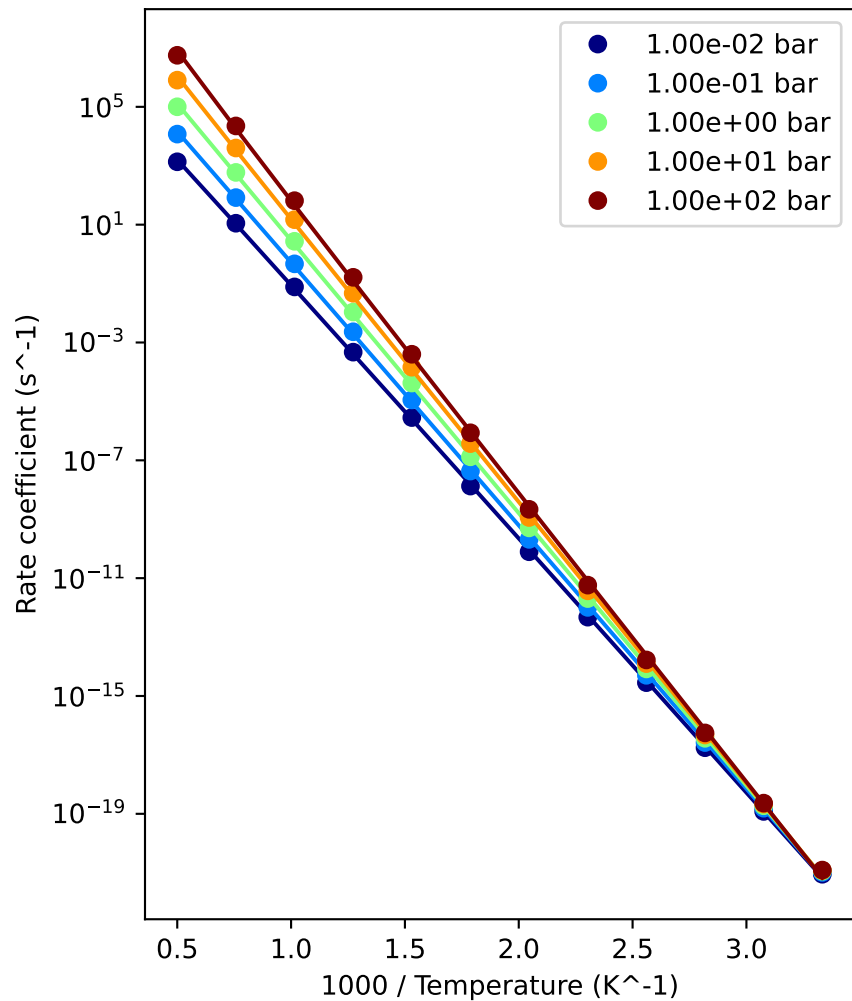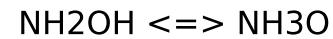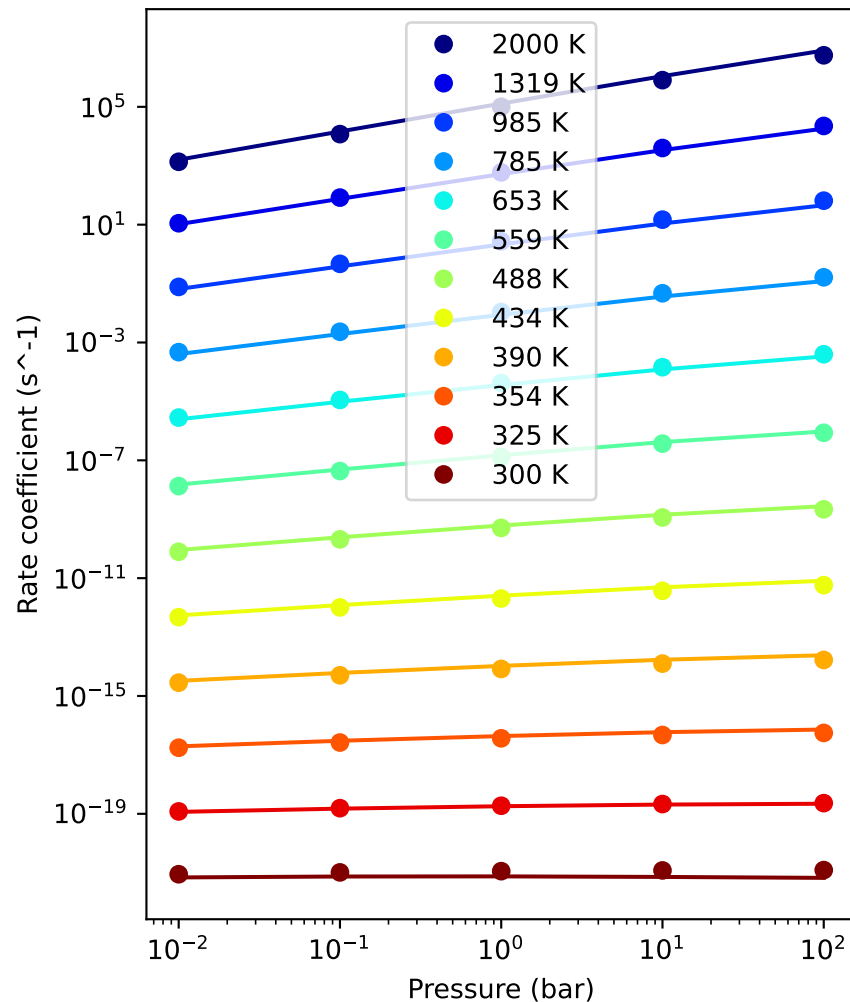

Supplement: d5cp04149j2.zip [file kinetics_3.pdf › NH3_PCCP_SI_revision_Feb11/figures/kinetics_3.pdf]

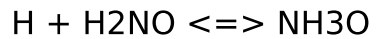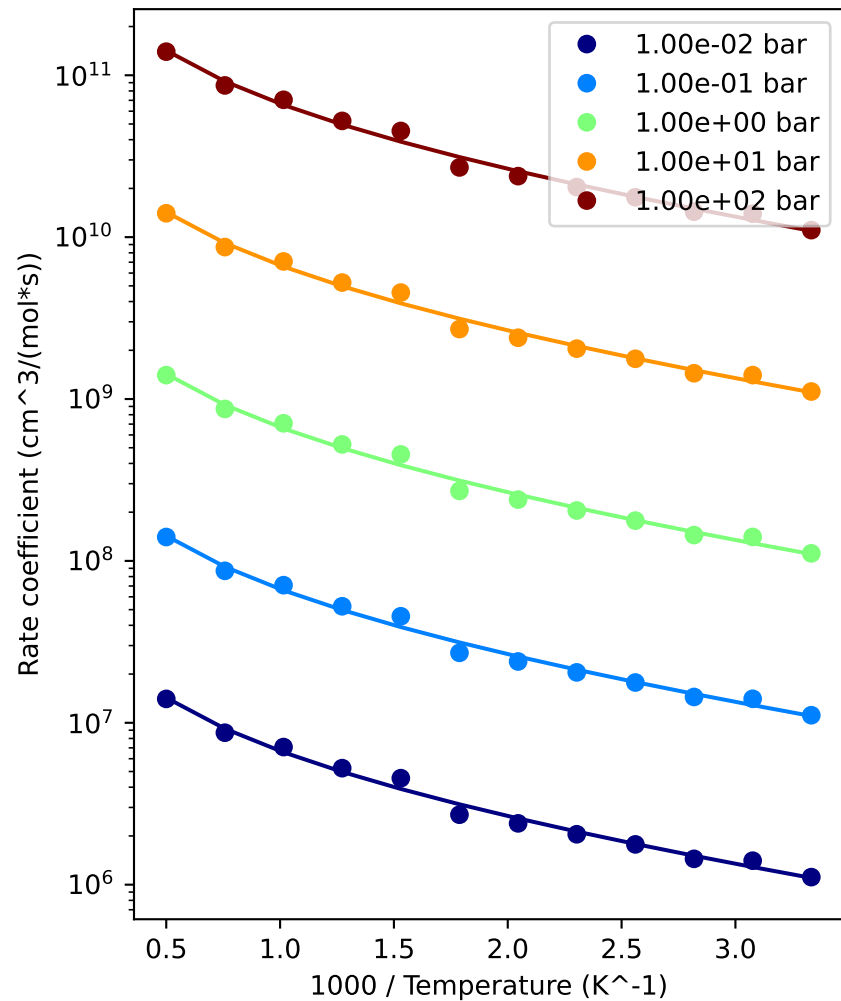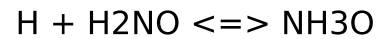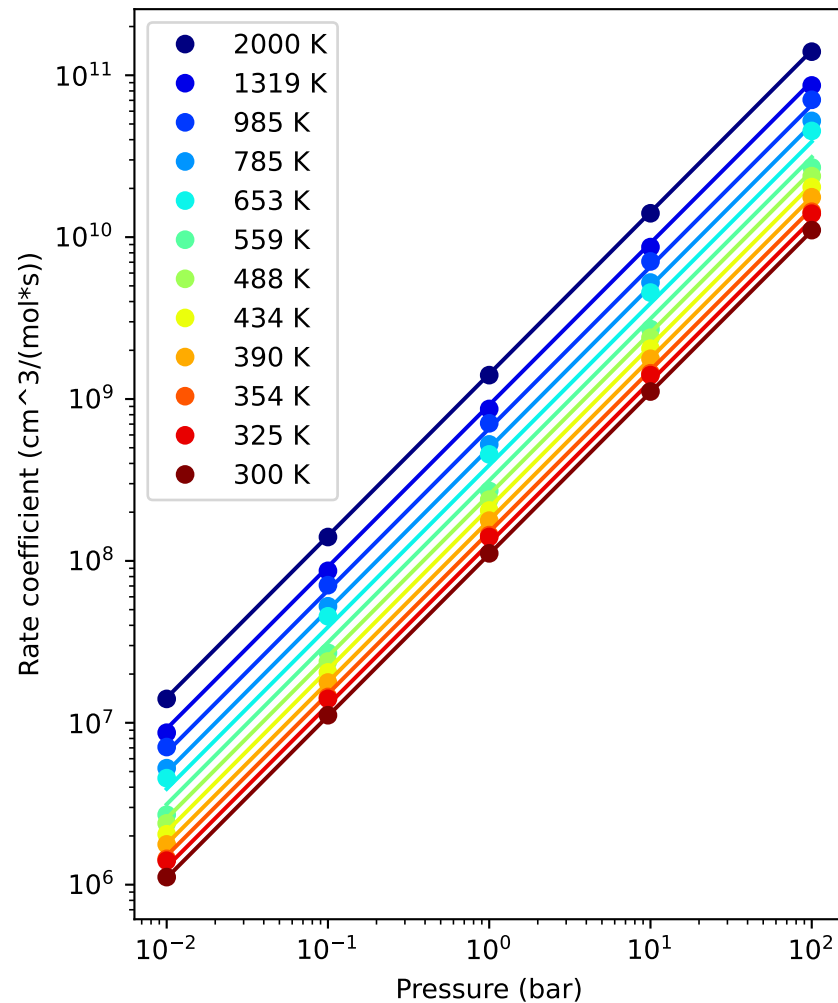

Supplement: d5cp04149j2.zip [file kinetics_4.pdf › NH3_PCCP_SI_revision_Feb11/figures/kinetics_4.pdf]

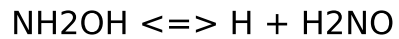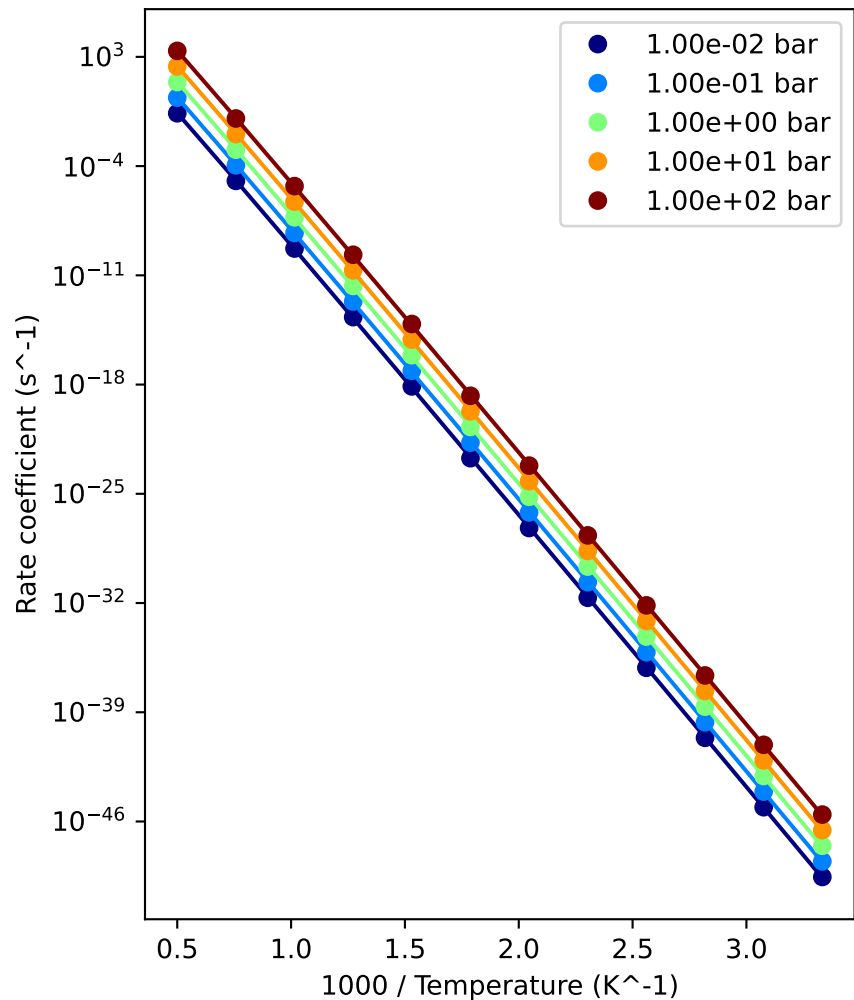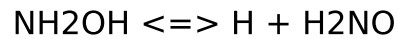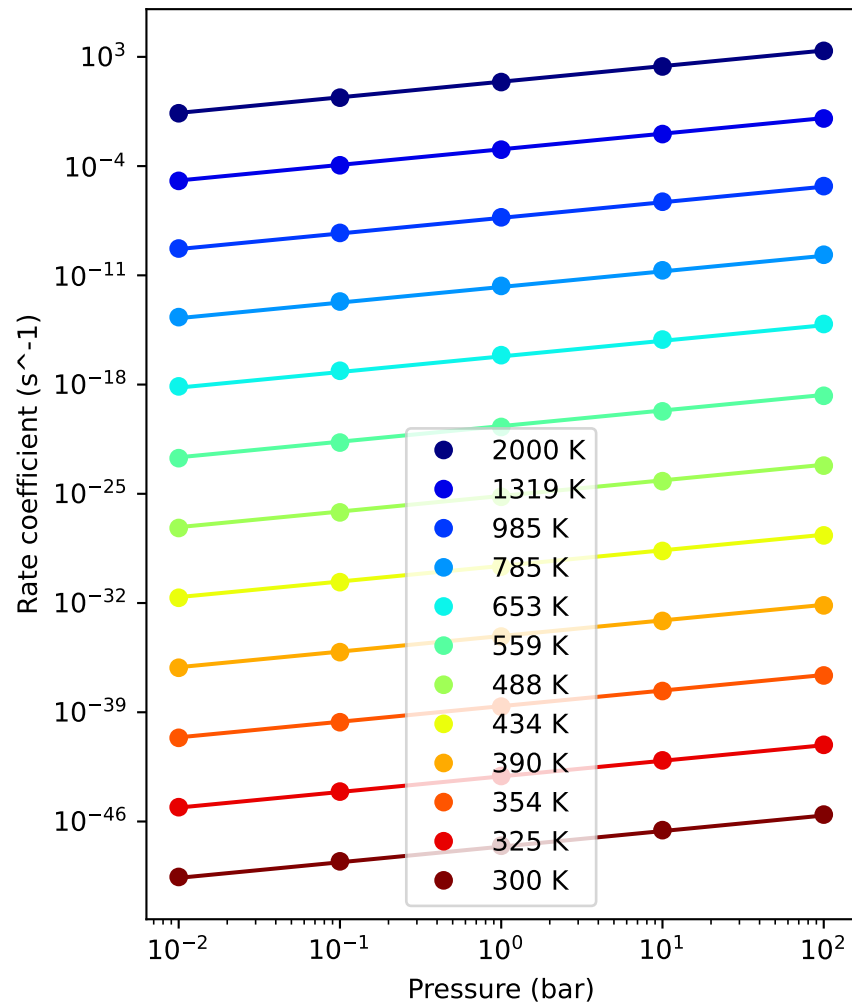

Supplement: d5cp04149j2.zip [file kinetics_5.pdf › NH3_PCCP_SI_revision_Feb11/figures/kinetics_5.pdf]

NH3O <=> H + H2NO

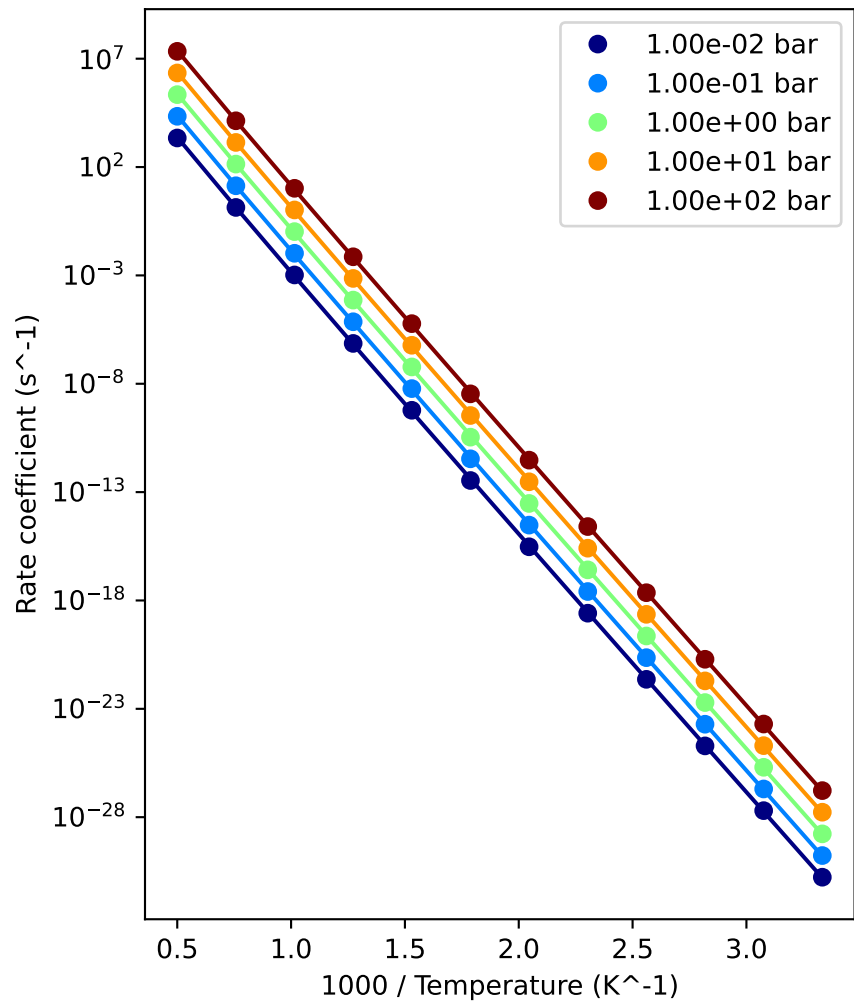

NH3O <=> H + H2NO

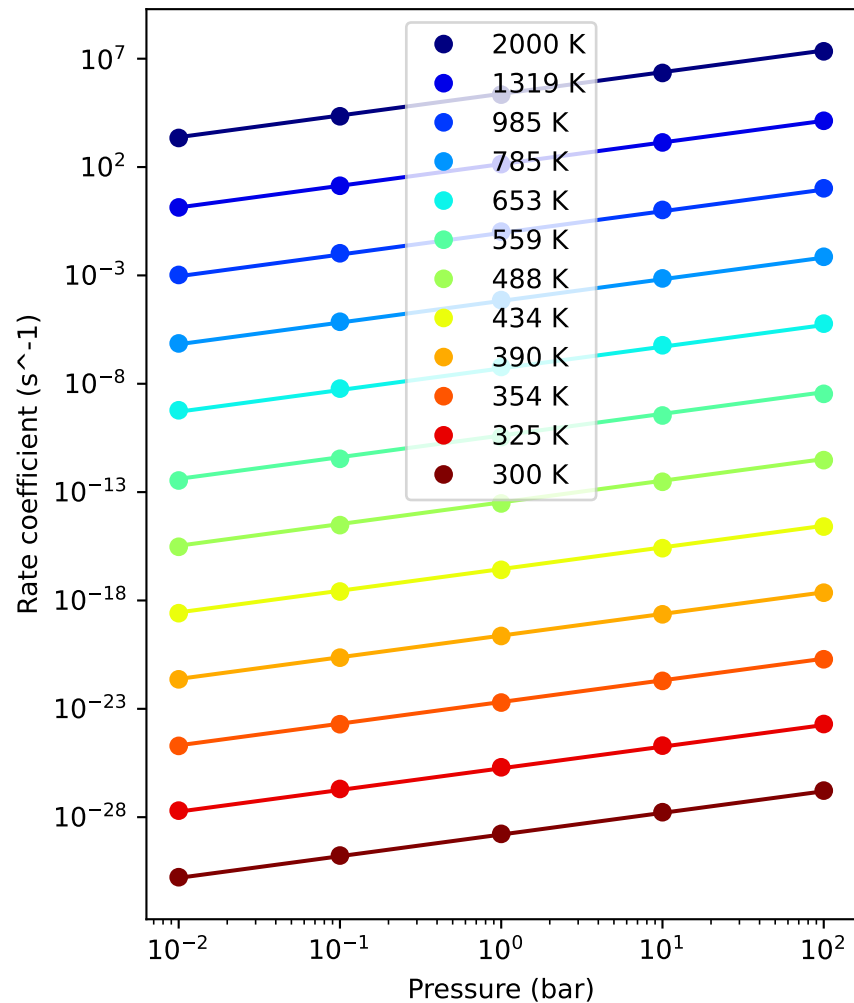

Supplement: d5cp04149j2.zip [file kinetics_6.pdf › NH3_PCCP_SI_revision_Feb11/figures/kinetics_6.pdf]

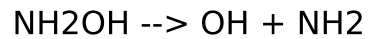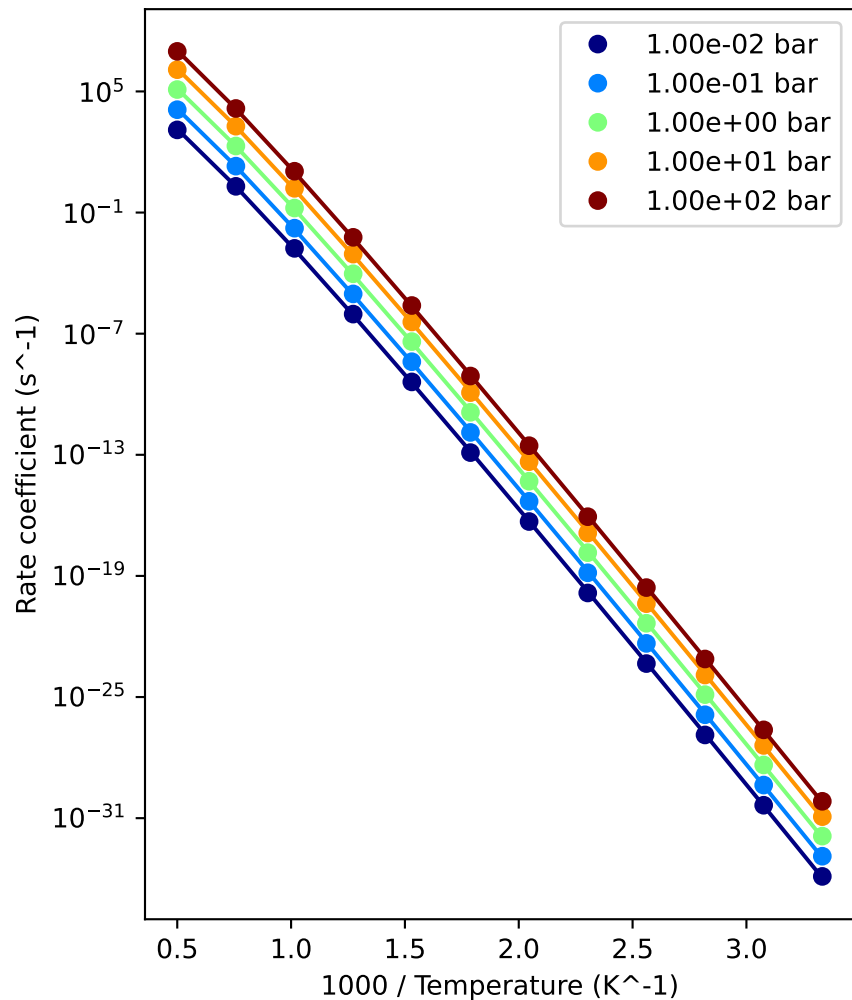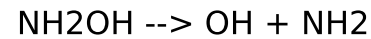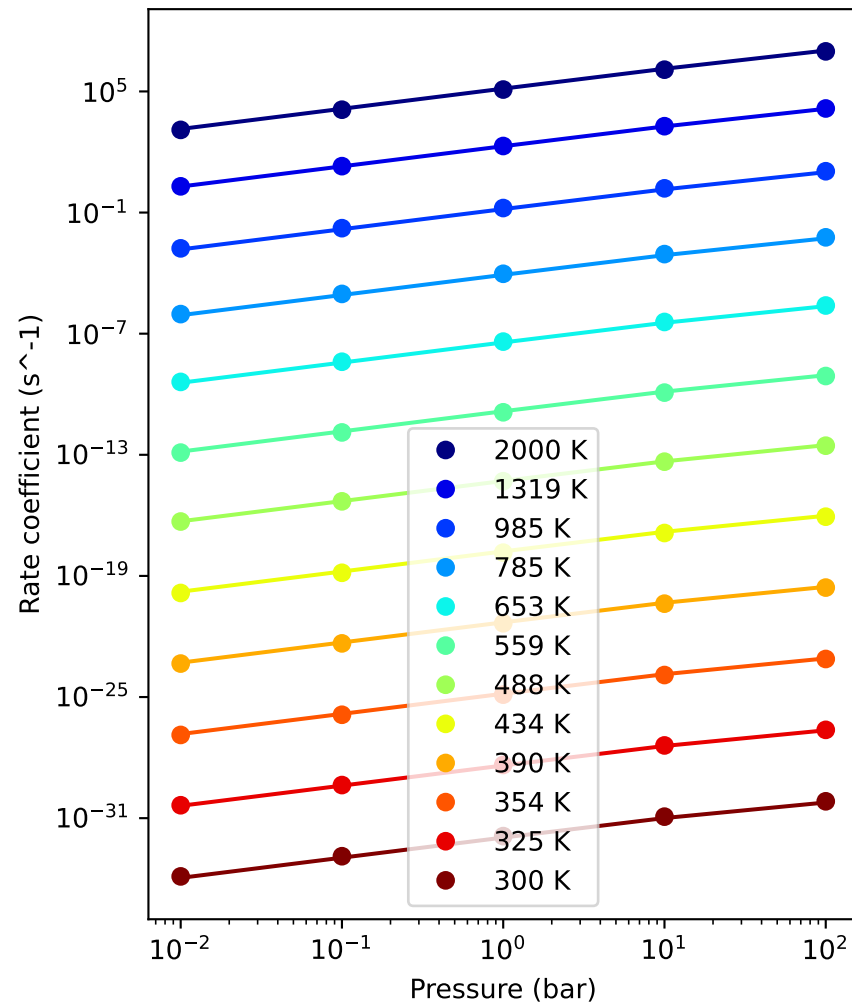

Supplement: d5cp04149j2.zip [file kinetics_7.pdf › NH3_PCCP_SI_revision_Feb11/figures/kinetics_7.pdf]

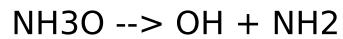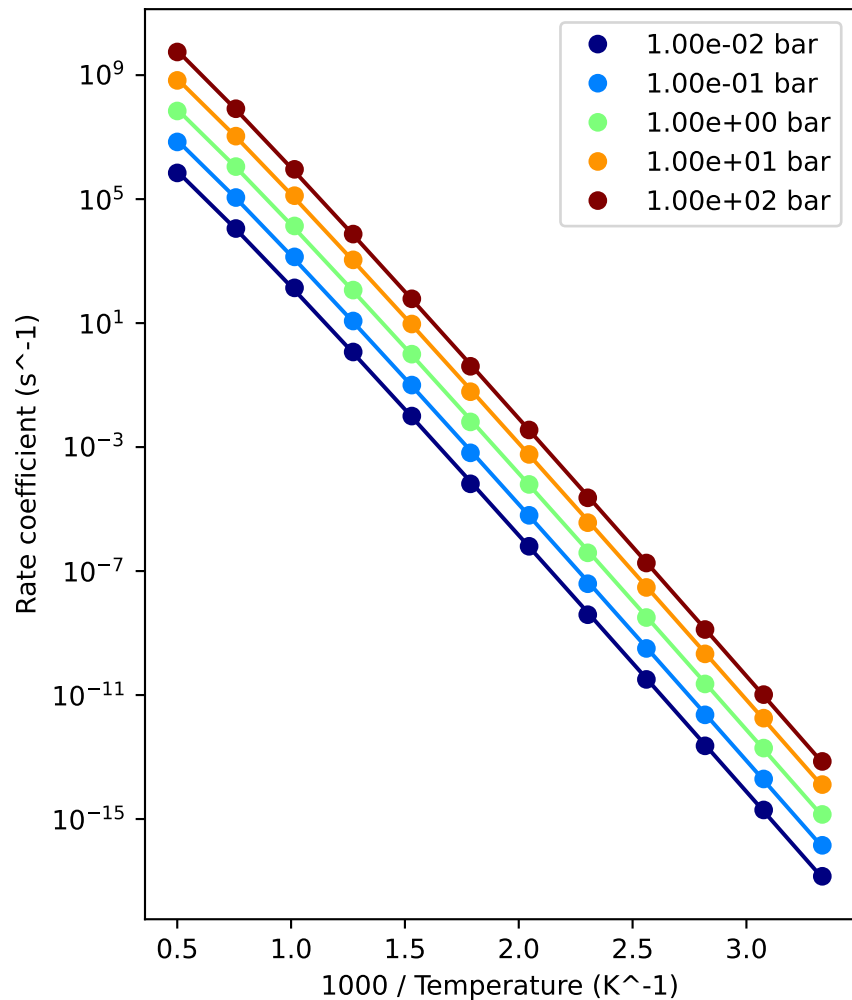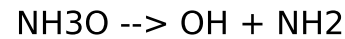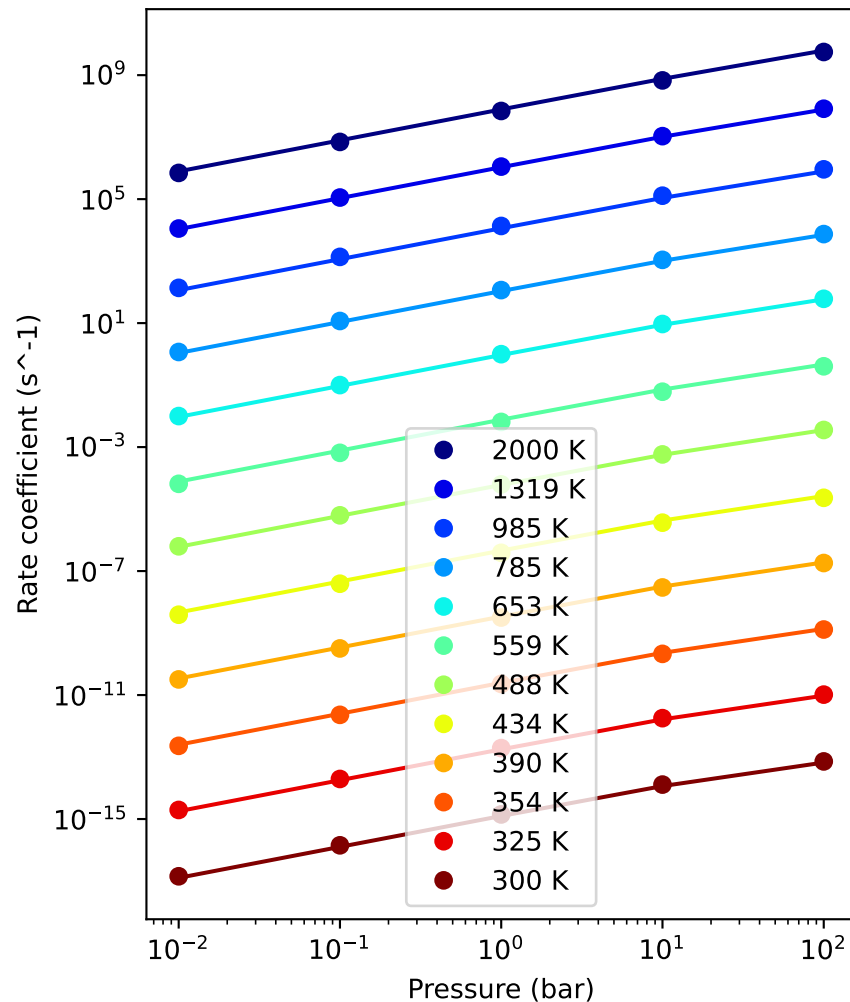

Supplement: d5cp04149j2.zip [file kinetics_8.pdf › NH3_PCCP_SI_revision_Feb11/figures/kinetics_8.pdf]

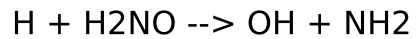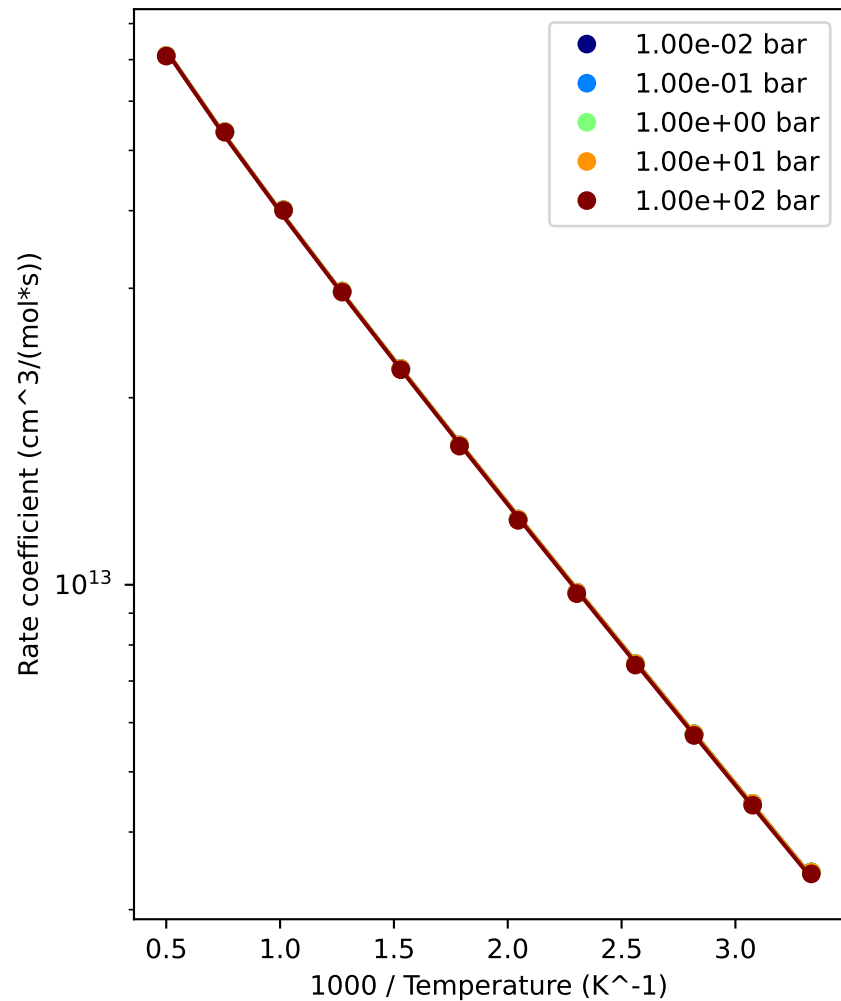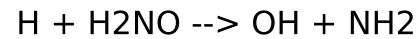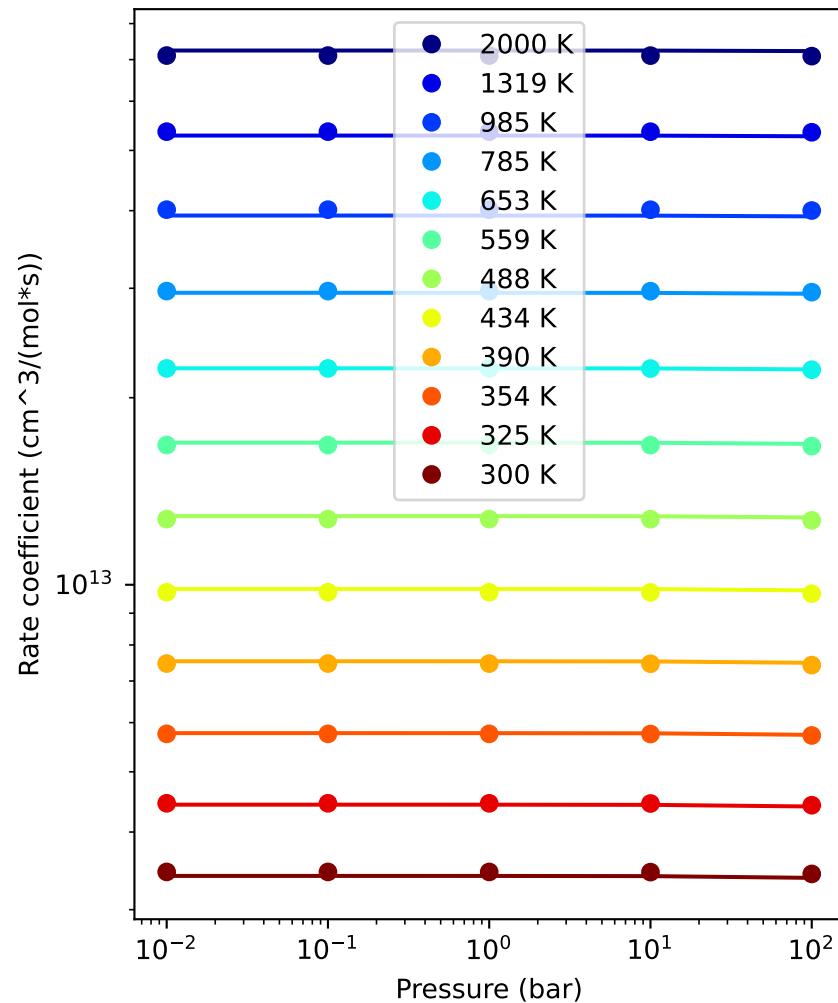

Supplement: d5cp04149j2.zip [file kinetics_9.pdf › NH3_PCCP_SI_revision_Feb11/figures/kinetics_9.pdf]
